# Supplementary material for: Fluorescent reporters for markerless genomic integration in Staphylococcus aureus
Source: PubMed Central journal article supplement (PMC5339689; doi:10.1038/srep43889), 2017-03-07
Supplement: srep43889-s1.pdf [file srep43889-s1.pdf]

1 **Fluorescent reporters for markerless genomic integration in**  
2 ***Staphylococcus aureus***

3

4 Nienke de Jong<sup>a</sup>, Thijs van der Horst<sup>a</sup>, Jos van Strijp<sup>a</sup> and Reindert Nijland<sup>a,b,\*</sup>

5 a) Medical Microbiology, University Medical Center Utrecht, Utrecht, The Netherlands

6 b) Laboratory of Phytopathology, Wageningen University, Wageningen, The Netherlands

7

8 \*) Corresponding author:

9 Tel: +31 317 4 83427

10 e-mail: [reindert.nijland@wur.nl](mailto:reindert.nijland@wur.nl)

11

12 **Supplemental data**

13

14 **Supplemental table 1: Gene identifiers for commonly used *S. aureus* laboratory strains for**  
 15 **genes identical to *S. aureus* Newman gene 29.**

| <i>S. aureus</i> subsp. aureus strain: | NCBI Reference Sequence + location in chromosome | Locus tag NWMN_0029 homolog<br>Re-annotated locus tag (14) |
|----------------------------------------|--------------------------------------------------|------------------------------------------------------------|
| Newman                                 | NC_009641.1 (40821..42014)                       | NWMN_0029<br>NWMN_RS00180                                  |
| MW2                                    | NC_003923.1 (67771..68964)                       | MW0058<br>MW_RS00305                                       |
| USA300_FPR3757                         | NC_007793.1 (95560..96753)                       | SAUSA300_0087<br>SAUSA300_RS00450                          |
| COL                                    | NC_002951.2 (74754..75947)                       | SACOL0065<br>SACOL_RS00335                                 |
| NCTC 8325                              | NC_007795.1 (40821..42014)                       | SAOUHSC_00037<br>Not re-annotated?                         |
| N315                                   | NC_002745.2 (93968..95161)                       | SA0084<br>SA_RS00575                                       |
| MSSA476                                | NC_002953.3 (66478..67671)                       | SAS0058<br>SAS_RS00285                                     |

17 **Supplemental table 2: Availability of plasmids and cloning vectors**

| plasmid        | Genotype/properties                                       | Plasmid + sequence available from                                                                                                                                |
|----------------|-----------------------------------------------------------|------------------------------------------------------------------------------------------------------------------------------------------------------------------|
| pCM29          | Plasmid for <i>sarA</i> P1- sGFP expression               | Pang, <i>et al.</i> Journal of Innate Immunity 2, 546 (2010)                                                                                                     |
| pTH1           | Plasmid for <i>sarA</i> P1- dsRED expression              | Addgene, #84451                                                                                                                                                  |
| pTH2           | Plasmid for <i>sarA</i> P1- CFP expression                | Addgene, #84452                                                                                                                                                  |
| pTH3           | Plasmid for <i>sarA</i> P1- YFP expression                | Addgene, #84453                                                                                                                                                  |
| pRN10          | Plasmid for <i>sarA</i> P1- mKate expression              | Addgene, #84454                                                                                                                                                  |
| pRN11          | Plasmid for <i>sarA</i> P1- mCherry expression            | Addgene, #84455                                                                                                                                                  |
| pRN12          | Plasmid for <i>sarA</i> P1- mAmetrine expression          | Addgene, #84456                                                                                                                                                  |
| pJB38          | Temperature sensitive plasmid for chromosomal integration | BEI, <a href="https://www.beiresources.org/http://app1.unmc.edu/fgx/Static/pJB38.txt">https://www.beiresources.org/http://app1.unmc.edu/fgx/Static/pJB38.txt</a> |
| pJB38-NWMN2930 | pJB38 plasmid containing Newman gene region 29-30         | Addgene, #84457                                                                                                                                                  |
| pTH100         | pJB38-NWMN29-30 + SarA_P1-sGFP-Term                       | Addgene, #84458                                                                                                                                                  |
| pTH101         | pJB38-NWMN29-30 + SarA_P1-DsRed-Term                      | Addgene, #84459                                                                                                                                                  |
| pTH102         | pJB38-NWMN29-30 + SarA_P1-CFP-Term                        | Addgene, #84460                                                                                                                                                  |
| pTH103         | pJB38-NWMN29-30 + SarA_P1-YFP-Term                        | Addgene, #84461                                                                                                                                                  |
| pRN110         | pJB38-NWMN29-30 + SarA_P1-mKate2-Term                     | Addgene, #84462                                                                                                                                                  |
| pRN111         | pJB38-NWMN29-30 + SarA_P1-mCherry-Term                    | Addgene, # 84463                                                                                                                                                 |
| pRN112         | pJB28-NWMN29-30+ SarA_P1-mAmetrine-Term                   | Addgene, # 84464                                                                                                                                                 |

18

19

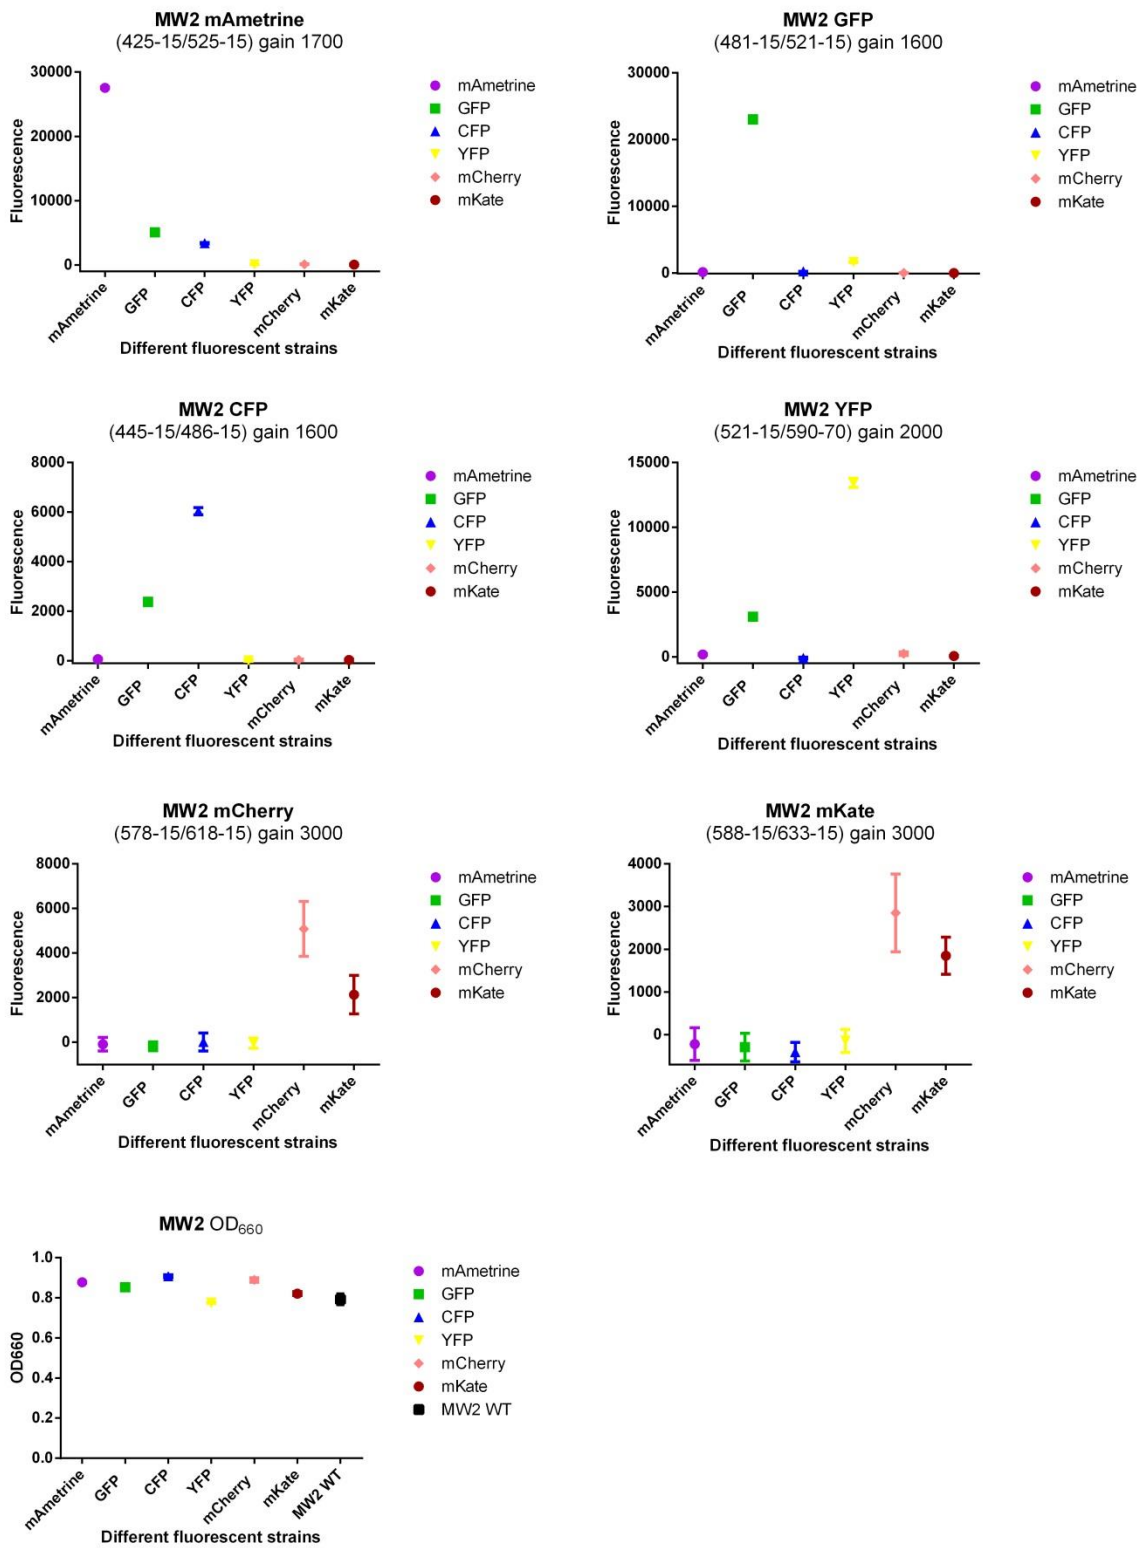

20  
 21 **Supplemental fig 1:** Spectral separation and intensity of all fluorescent constructs obtained by  
 22 integration in the chromosome of *S. aureus* strains MW2. Data points show mean +/- SD is  
 23 shown of 4 technical replicates.
